# Supplementary material
Source: PubMed Central journal article supplement (PMC3347661)
Supplement: supp_2011.048132_2011.048132.Wang_suppl.pdf [file supp_2011.048132_2011.048132.Wang_suppl.pdf]

## MicroRNA profiling of follicular lymphoma identifies microRNAs related to cell proliferation and tumor response

Weixin Wang,<sup>1</sup> Meghan Corrigan-Cummins,<sup>1</sup> Justin Hudson,<sup>2</sup> Irina Maric,<sup>1</sup> Olga Simakova,<sup>1</sup> Sattva S. Neelapu,<sup>3</sup> Larry W. Kwak,<sup>3</sup> John E. Janik,<sup>4</sup> Barry Gause,<sup>5</sup> Elaine S. Jaffe,<sup>6</sup> and Katherine R. Calvo<sup>1</sup>

<sup>1</sup>Hematology Section, Department of Laboratory Medicine, National Institutes of Health Clinical Center, Bethesda, MD; <sup>2</sup>Howard University College of Medicine, Washington, DC; <sup>3</sup>Department of Lymphoma and Myeloma, Division of Cancer Medicine, The University of Texas M.D. Anderson Cancer Center, Houston, TX; <sup>4</sup>Metabolism Branch, National Cancer Institute, Bethesda, MD; <sup>5</sup>SAIC, National Cancer Institute (NCI), Frederick, MD; and <sup>6</sup>Laboratory of Pathology, National Cancer Institute, Bethesda, MD, USA

Citation: Wang W, Corrigan-Cummins M, Hudson J, Maric I, Simakova O, Neelapu SS, Kwak LW, Janik JE, Gause B, Jaffe ES, and Calvo KR. MicroRNA profiling of follicular lymphoma identifies microRNAs related to cell proliferation and tumor response. *Haematologica* 2012;97(4):586-594. doi:10.3324/haematol.2011.048132

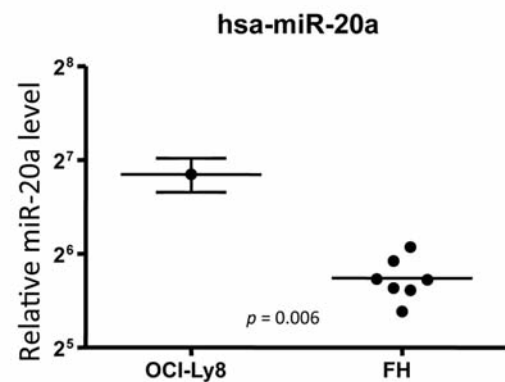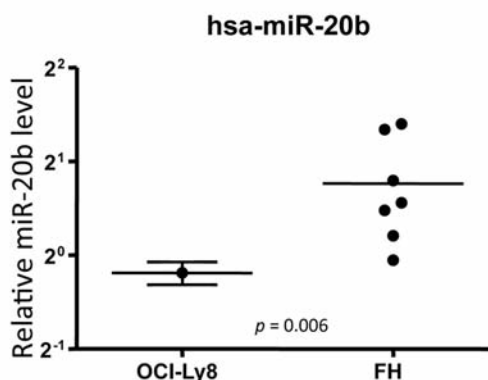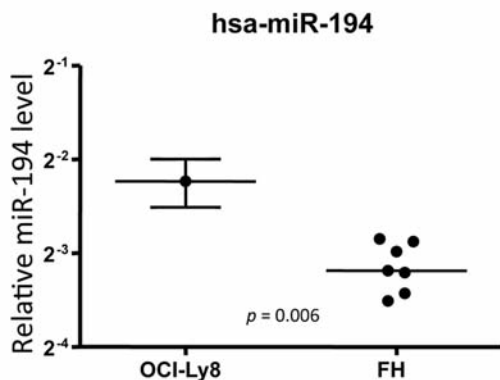

**Online Supplementary Figure S1.** miR-20a, -20b, and -194 expression in OCI-Ly8 cells. The levels of endogenous expression of miR-20a, -20b, and -194 were determined by TaqMan quantitative real-time PCR assay in triplicate experiments. RNA from seven FH B cells was used as the control. Four small nuclear and nucleolar RNA, RNU66, RNU38b, Z30, and RNU6B, were used as the internal control. The  $\Delta$ Ct value was calculated as Ct value of target miR probe subtracted from the geometrical mean of Ct values of RNU66, RNU38b, Z30, and RNU6B. The relative miR expression level was calculated as  $2^{-\Delta Ct}$ . Mean and standard deviation of triplicate experiments are shown for OCI-Ly8 cells; the line indicates the mean value for seven FH B-cell samples.  $P=0.006$ , 2.16-fold for miR-20a;  $P=0.006$ , 0.52-fold for miR-20b; and  $P=0.006$ , 1.86-fold for miR-194.

Online Supplementary Table S1. List of 199 genes for expression profiling using NanoString nCount.

|         |          |          |           |
|---------|----------|----------|-----------|
| ABCC11  | CXCR5    | IRF4     | PTEN      |
| ABCE1   | DGCR8    | ITK      | RAD51     |
| ABL1    | DICER1   | JAK1     | RECQL     |
| ABL2    | DOCK2    | JAK2     | REL       |
| ADAP1   | DROSHA   | JUN      | REV1      |
| AICDA   | E2F1     | KDM6B    | ROR1      |
| AKT1    | E2F5     | KIAA1274 | RPS6KB1   |
| API5    | EIF2C1   | KLF12    | RUNX1     |
| ATM     | EIF2C2   | KLF4     | S100A9    |
| ATR     | EIF2C4   | KLK10    | SERPINA9  |
| B3GAT1  | EIF4EBP1 | LAT      | SIRT1     |
| BACH1   | EP300    | LEF1     | SMAD1     |
| BACH2   | EPHA2    | LGALS3   | SMAD4     |
| BAX     | ERBB3    | LMO2     | SMAD5     |
| BCL11B  | ERCC5    | LTA      | SOCS1     |
| BCL2    | EZH2     | MAF      | SOCS2     |
| BCL6    | FAS      | MALT1    | SOX2      |
| BLM     | FASLG    | MAPK1    | SPI1      |
| BRCA1   | FCER2    | MAPK3    | SPIB      |
| BRCA2   | FOXM1    | MDM2     | STAT1     |
| C4A     | FOXP1    | MED1     | STAT2     |
| CASP1   | FOXP3    | MIDN     | STAT3     |
| CASP2   | FYN      | MKI67    | STAT4     |
| CASP8   | GADD45A  | MLL      | STAT5A    |
| CAV1    | GADD45B  | MLL2     | SYK       |
| CCL2    | GAPDH    | MME      | TAB2      |
| CCND1   | GCET2    | MMP9     | TANK      |
| CCND2   | GUSB     | MTOR     | TERT      |
| CCNL2   | HDAC1    | MYB      | TGFB1     |
| CCR7    | HGF      | MYC      | TNF       |
| CD38    | HOXB2    | NEK2     | TNFRSF13B |
| CD3E    | HOXD8    | NEUROG1  | TNFRSF17  |
| CD40    | HPRT1    | NFKB1    | TNFRSF1A  |
| CD40LG  | IBTK     | NFKB2    | TNFRSF1B  |
| CD7     | IFNG     | NFKBIA   | TNFRSF25  |
| CD8B    | IKBKB    | NOTCH1   | TNFSF10   |
| CDC20   | IKBKG    | NUCB1    | TNFSF12   |
| CDC42   | IL10     | PAK4     | TNFSF13   |
| CDK6    | IL10RA   | PAX5     | TNFSF13B  |
| CDKN1A  | IL15     | PDCD1    | TNFSF9    |
| CEBPB   | IL1B     | PGK1     | TP53      |
| CFLAR   | IL21     | PIK3R1   | TRAF1     |
| CHEK1   | IL21R    | POU3F2   | TXNIP     |
| COL9A1  | IL4      | PPM1E    | UBE2I     |
| CSNK1G2 | IL4R     | PRDM1    | USP14     |
| CTNNB1  | IL6      | PRKCB    | VEGFA     |
| CUX1    | IL7R     | PRKCE    | XBP1      |
| CXCL12  | IL8      | PRKCQ    | ZEB1      |
| CXCL13  | ING1     | PRKCZ    | ZEB2      |
| CXCR4   | INPPL1   | PRKRA    |           |

Online Supplementary Table S2. miRNAs differentially expressed in FL.

| <b>Systematic Name</b> | <b>FL vs FH-regulation</b> | <b>p-value</b> | <b>Fold change</b> |
|------------------------|----------------------------|----------------|--------------------|
| hsa-let-7a             | up                         | 0.02           | 13.55              |
| hsa-let-7c             | up                         | 0.02           | 9.93               |
| hsa-let-7f             | up                         | 0.02           | 18.60              |
| hsa-let-7f-1*          | down                       | 0.02           | -2.00              |
| hsa-miR-106a*          | down                       | 0.02           | -2.87              |
| hsa-miR-1205           | down                       | 0.02           | -2.28              |
| hsa-miR-1224-3p        | down                       | 0.02           | -2.20              |
| hsa-miR-1243           | down                       | 0.02           | -2.36              |
| hsa-miR-1251           | down                       | 0.02           | -2.02              |
| hsa-miR-1252           | down                       | 0.02           | -2.06              |
| hsa-miR-1260           | up                         | 0.02           | 7.26               |
| hsa-miR-1274a          | up                         | 0.02           | 11.61              |
| hsa-miR-1274b          | up                         | 0.02           | 9.14               |
| hsa-miR-128            | up                         | 0.02           | 5.90               |
| hsa-miR-1287           | up                         | 0.01           | 9.49               |
| hsa-miR-1288           | up                         | 0.02           | 5.08               |
| hsa-miR-1295           | up                         | 0.02           | 8.35               |
| hsa-miR-1297           | down                       | 0.02           | -2.20              |
| hsa-miR-1322           | down                       | 0.02           | -2.40              |
| hsa-miR-135a           | down                       | 0.02           | -2.14              |
| hsa-miR-138-1*         | down                       | 0.03           | -2.03              |
| hsa-miR-141            | down                       | 0.01           | -6.26              |
| hsa-miR-141*           | down                       | 0.03           | -2.02              |
| hsa-miR-143*           | down                       | 0.02           | -2.10              |
| hsa-miR-147            | down                       | 0.02           | -2.23              |
| hsa-miR-1471           | up                         | 0.01           | 9.00               |
| hsa-miR-151-5p         | up                         | 0.02           | 8.26               |
| hsa-miR-15b            | up                         | 0.02           | 14.30              |
| hsa-miR-16             | up                         | 0.02           | 7.79               |
| hsa-miR-17*            | down                       | 0.01           | -3.49              |
| hsa-miR-187            | down                       | 0.02           | -2.11              |
| hsa-miR-188-3p         | down                       | 0.02           | -2.38              |
| hsa-miR-18b*           | down                       | 0.02           | -2.83              |
| hsa-miR-1910           | down                       | 0.02           | -2.04              |
| hsa-miR-1913           | down                       | 0.02           | -2.42              |
| hsa-miR-193a-5p        | up                         | 0.01           | 8.79               |
| hsa-miR-193b*          | up                         | 0.01           | 7.66               |
| hsa-miR-194            | up                         | 0.02           | 5.85               |
| hsa-miR-195            | up                         | 0.02           | 8.53               |
| hsa-miR-19a*           | down                       | 0.02           | -2.14              |
| hsa-miR-200a           | down                       | 0.03           | -2.87              |
| hsa-miR-200b           | down                       | 0.02           | -5.20              |
| hsa-miR-202            | down                       | 0.01           | -3.30              |
| hsa-miR-203            | down                       | 0.02           | -6.80              |
| hsa-miR-205            | down                       | 0.01           | -31.12             |

*continued on next page*

continued from previous page

|                  |      |      |       |
|------------------|------|------|-------|
| hsa-miR-20a      | up   | 0.02 | 9.09  |
| hsa-miR-20b      | up   | 0.02 | 7.27  |
| hsa-miR-218-1*   | down | 0.02 | -2.22 |
| hsa-miR-219-1-3p | down | 0.02 | -2.28 |
| hsa-miR-22       | down | 0.02 | -2.06 |
| hsa-miR-221*     | up   | 0.02 | 6.00  |
| hsa-miR-222      | down | 0.02 | -2.12 |
| hsa-miR-222*     | down | 0.02 | -2.39 |
| hsa-miR-26a-2*   | down | 0.02 | -2.20 |
| hsa-miR-26b      | up   | 0.02 | 13.16 |
| hsa-miR-27b*     | down | 0.02 | -2.00 |
| hsa-miR-297      | down | 0.02 | -2.20 |
| hsa-miR-299-5p   | down | 0.02 | -2.12 |
| hsa-miR-301b     | down | 0.02 | -2.58 |
| hsa-miR-302d*    | down | 0.02 | -2.07 |
| hsa-miR-30a      | down | 0.01 | -3.09 |
| hsa-miR-30b      | up   | 0.02 | 15.15 |
| hsa-miR-323-5p   | down | 0.02 | -2.02 |
| hsa-miR-323b-5p  | down | 0.02 | -2.64 |
| hsa-miR-330-5p   | down | 0.02 | -2.07 |
| hsa-miR-33a      | down | 0.01 | -3.22 |
| hsa-miR-345      | up   | 0.01 | 6.78  |
| hsa-miR-34a      | up   | 0.02 | 17.50 |
| hsa-miR-363*     | down | 0.02 | -2.08 |
| hsa-miR-374a     | up   | 0.02 | 23.72 |
| hsa-miR-374b     | up   | 0.02 | 15.79 |
| hsa-miR-379*     | down | 0.02 | -2.08 |
| hsa-miR-380      | down | 0.02 | -2.08 |
| hsa-miR-410      | down | 0.02 | -2.36 |
| hsa-miR-429      | down | 0.02 | -2.16 |
| hsa-miR-431*     | down | 0.02 | -3.27 |
| hsa-miR-449b     | down | 0.02 | -2.12 |
| hsa-miR-450b-3p  | down | 0.02 | -2.54 |
| hsa-miR-451      | up   | 0.02 | 7.52  |
| hsa-miR-454      | up   | 0.02 | 9.02  |
| hsa-miR-454*     | down | 0.02 | -2.22 |
| hsa-miR-486-3p   | up   | 0.02 | 5.60  |
| hsa-miR-497*     | down | 0.02 | -2.01 |
| hsa-miR-502-3p   | up   | 0.02 | 6.23  |
| hsa-miR-513a-5p  | up   | 0.01 | 15.39 |
| hsa-miR-513b     | up   | 0.01 | 7.86  |
| hsa-miR-520h     | down | 0.02 | -2.08 |
| hsa-miR-532-3p   | up   | 0.02 | 5.94  |
| hsa-miR-544      | down | 0.02 | -2.05 |
| hsa-miR-548b-3p  | down | 0.02 | -2.02 |
| hsa-miR-548h     | down | 0.02 | -2.36 |
| hsa-miR-548j     | down | 0.02 | -2.05 |
| hsa-miR-558      | down | 0.02 | -2.23 |

continued on next page

continued from previous page

|                |      |      |       |
|----------------|------|------|-------|
| hsa-miR-562    | down | 0.02 | -2.15 |
| hsa-miR-567    | down | 0.02 | -2.02 |
| hsa-miR-569    | down | 0.02 | -2.15 |
| hsa-miR-570    | down | 0.02 | -3.31 |
| hsa-miR-574-3p | up   | 0.01 | 5.96  |
| hsa-miR-582-3p | down | 0.02 | -2.28 |
| hsa-miR-584    | up   | 0.01 | 11.69 |
| hsa-miR-591    | down | 0.02 | -2.16 |
| hsa-miR-599    | down | 0.02 | -2.04 |
| hsa-miR-600    | down | 0.02 | -2.57 |
| hsa-miR-603    | down | 0.02 | -2.69 |
| hsa-miR-604    | down | 0.02 | -2.42 |
| hsa-miR-606    | down | 0.02 | -2.44 |
| hsa-miR-614    | down | 0.02 | -2.38 |
| hsa-miR-615-3p | down | 0.02 | -2.27 |
| hsa-miR-626    | down | 0.02 | -2.24 |
| hsa-miR-628-5p | down | 0.02 | -2.01 |
| hsa-miR-641    | down | 0.02 | -2.34 |
| hsa-miR-646    | down | 0.02 | -2.12 |
| hsa-miR-647    | down | 0.02 | -2.25 |
| hsa-miR-653    | down | 0.02 | -2.12 |
| hsa-miR-654-3p | down | 0.02 | -2.38 |
| hsa-miR-655    | down | 0.02 | -2.24 |
| hsa-miR-660    | up   | 0.02 | 9.84  |
| hsa-miR-661    | down | 0.02 | -2.03 |
| hsa-miR-663    | up   | 0.01 | 9.88  |
| hsa-miR-664    | up   | 0.01 | 7.69  |
| hsa-miR-664*   | up   | 0.01 | 9.65  |
| hsa-miR-708*   | down | 0.02 | -2.47 |
| hsa-miR-7-1*   | up   | 0.02 | 7.09  |
| hsa-miR-767-5p | down | 0.02 | -2.27 |
| hsa-miR-873    | down | 0.02 | -2.17 |
| hsa-miR-888    | down | 0.02 | -2.40 |
| hsa-miR-892a   | down | 0.02 | -2.05 |
| hsa-miR-9      | up   | 0.02 | 8.71  |
| hsa-miR-9*     | up   | 0.02 | 10.46 |
| hsa-miR-922    | down | 0.02 | -2.32 |
| hsa-miR-935    | down | 0.02 | -2.22 |
| hsa-miR-96     | up   | 0.02 | 8.88  |
| hsa-miR-96*    | down | 0.02 | -2.25 |
| hsa-miR-98     | up   | 0.02 | 7.64  |

Online Supplementary Table S3. Genes differentially expressed in FL.

| <b>GENE ID</b> | <b>FL vs FH-regulation</b> | <b>p-value</b> | <b>Fold change</b> |
|----------------|----------------------------|----------------|--------------------|
| ADAP1          | down                       | 0.05           | -4.79              |
| AKT1           | up                         | 0.02           | 1.72               |
| BACH1          | down                       | 0.03           | -2.03              |
| BAX            | up                         | 0.03           | 1.82               |
| BCL2           | up                         | 0.02           | 16.29              |
| BCL6           | up                         | 0.03           | 1.91               |
| BRCA1          | down                       | 0.04           | -2.14              |
| CDKN1A         | down                       | 0.03           | -11.80             |
| CHEK1          | down                       | 0.02           | -4.15              |
| CUX1           | up                         | 0.02           | 2.45               |
| CXCL13         | down                       | 0.04           | -2.50              |
| DROSHA         | up                         | 0.04           | 1.32               |
| EP300          | up                         | 0.03           | 1.50               |
| EPHA2          | down                       | 0.01           | -11.42             |
| ERBB3          | down                       | 0.02           | -2.35              |
| GADD45B        | down                       | 0.02           | -10.10             |
| HOXB2          | down                       | 0.03           | -4.26              |
| IKBKG          | up                         | 0.03           | 1.71               |
| IL10           | down                       | 0.01           | -7.17              |
| IL1B           | down                       | 0.03           | -10.47             |
| IL21           | down                       | 0.03           | -1.55              |
| IL4R           | up                         | 0.03           | 3.12               |
| IL6            | down                       | 0.03           | -13.72             |
| IL8            | down                       | 0.02           | -30.61             |
| ING1           | down                       | 0.04           | -6.39              |
| JUN            | down                       | 0.04           | -5.18              |
| KLF4           | down                       | 0.03           | -17.24             |
| LGALS3         | down                       | 0.03           | -9.39              |
| MAF            | down                       | 0.03           | -1.64              |
| MAPK1          | up                         | 0.03           | 1.53               |
| MKI67          | down                       | 0.03           | -3.82              |
| MLL2           | up                         | 0.04           | 1.65               |
| MYC            | down                       | 0.03           | -3.72              |
| NFKBIA         | down                       | 0.04           | -2.06              |
| NUCB1          | up                         | 0.03           | 1.60               |
| PAX5           | up                         | 0.03           | 1.80               |
| PRDM1          | down                       | 0.03           | -7.93              |
| PRKCE          | up                         | 0.03           | 2.36               |
| RAD51          | down                       | 0.03           | -7.24              |
| RUNX1          | up                         | 0.03           | 2.00               |
| S100A9         | down                       | 0.03           | -17.70             |
| SOCS2          | down                       | 0.04           | -2.86              |
| STAT4          | down                       | 0.03           | -8.22              |
| SYK            | up                         | 0.03           | 1.65               |
| TNF            | down                       | 0.03           | -3.41              |
| UBE2I          | up                         | 0.03           | 1.46               |
| VEGFA          | down                       | 0.03           | -11.82             |
