# Supplementary material
Source: PubMed Central journal article supplement (PMC3347661)
Supplement: supp_2011.048132_2011_048132-Contributions.pdf [file supp_2011.048132_2011_048132-Contributions.pdf]

**Manuscript no. HAEMATOL/2011/048132 entitled “MicroRNA profiling of follicular lymphoma identifies microRNAs related to cell proliferation and tumor response”**

**Authors: Wang W, Corrigan-Cummins M, Hudson J, Maric I, Simakova O, Neelapu SS, Kwak LW, Janik JE, Gause B, Jaffe ES, Calvo KR**

**Information about the contributions of each person named as having participated in the study**

- 1) **Guarantor(s)**, i.e., person(s) who is (are) responsible for the integrity of the work as a whole:
- Katherine R. Calvo, National Institutes of Health Clinical Center, USA, calvok@mail.nih.gov
  - Weixin Wang, National Institutes of Health Clinical Center, USA, wangw6@cc.nih.gov

According to the International Committee of Medical Journal Editors (ICMJE) ([http://www.icmje.org/ethical\\_1author.html](http://www.icmje.org/ethical_1author.html)): “Authorship credit should be based on: 1) substantial contributions to conception and design, acquisition of data, or analysis and interpretation of data; 2) drafting the article or revising it critically for important intellectual content; and 3) final approval of the version to be published. Authors should meet conditions 1, 2, and 3 ..... Acquisition of funding, collection of data, or general supervision of the research group alone does not constitute authorship”.

The guarantors of this manuscript confirm that all persons designated as authors qualify for authorship, and that each author has participated sufficiently in the work to take public responsibility for appropriate portions of the content.

2) **Authors who participated in the conception of the study:** Katherine R. Calvo, Weixin Wang, Elaine Jaffe

3) **Design & Methods.** The following authors were responsible for specific investigations (please detail):

- Katherine R. Calvo and Weixin Wang designed the study
- Weixin Wang sorted B-cells and T-cells and performed the microRNA array experiments and NanoString gene expression array
- Weixin Wang, Meghan Corrigan-Cummins, and Justin Hudson performed the microRNA experiments and PCR validation in cell lines.
- Katherine R. Calvo, Weixin Wang, and Meghan Corrigan Cummins performed data analysis and interpretation of miRNA and gene expression data
- Irina Maric and Olga Simakova performed Flow cytometric analysis on sorted B-cell and T-cell populations.
- Sattva Neelapu, Larry Kwak, Barry Gause, and John Janik recruited patients, administered and assessed response to chemotherapy
- Elaine Jaffe provided pathology review of lymph nodes
- Sattva Neelapu and Larry Kwak obtained and processed tumor biopsy samples.

4) **Results.** The following authors were responsible for specific portions of the results, including figures and tables (please indicate the person responsible for each figure and each table):

- Weixin Wang, Katherine R. Calvo and Meghan Corrigan-Cummins were responsible for Figure 1 which incorporated data analysis from miR array with clinical outcome data obtained by John Janik, Barry Gause, Sattva Neelapu and Larry Kwak
- Weixin Wang, Katherine R. Calvo and Meghan Corrigan-Cummins were responsible for Figure 2. Weixin Wang did the NanoString Gene expression array. The data was analyzed and interpreted by Katherine R. Calvo, Weixin Wang, and Meghan Corrigan-Cummins.
- Weixin Wang, Meghan Corrigan-Cummins and Justin Hudson were responsible for Figures 3, 4, and 5.
- Weixin Wang was responsible for the Supplementary Tables and Figure.

5) **Writing the manuscript.** The following authors were responsible for writing the manuscript:

- Katherine R. Calvo
- Weixin Wang

6) **Contributors Listed in Acknowledgments:** (Examples of those who might be acknowledged include a person who provided purely technical help, writing assistance, or a department chair who provided only general support. Corresponding authors must declare whether they had assistance with the study design, data collection, data analysis, or manuscript preparation. If such assistance was available, the authors must disclose the identity of the individuals who provided this assistance and the entity that supported it. Financial and material support should also be acknowledged.)

- Dr. Mark Minden of the Ontario Cancer Institute provided the OCI-Ly8 cell line
- Kaska Wloka provided assistance retrieving tonsil specimens
- William Kopp provided assistance retrieving FL samples
- Ryan Plyler provided lab assistance
- Jamie Hahn assisted obtaining clinical records
